# Supplementary material for: CAR-NK Cells: A Chimeric Hope or a Promising Therapy?
Source: MDPI journal article supplement (doi:10.3390/cancers14153839), 2022-08-08
Supplement: s1 [file s1]

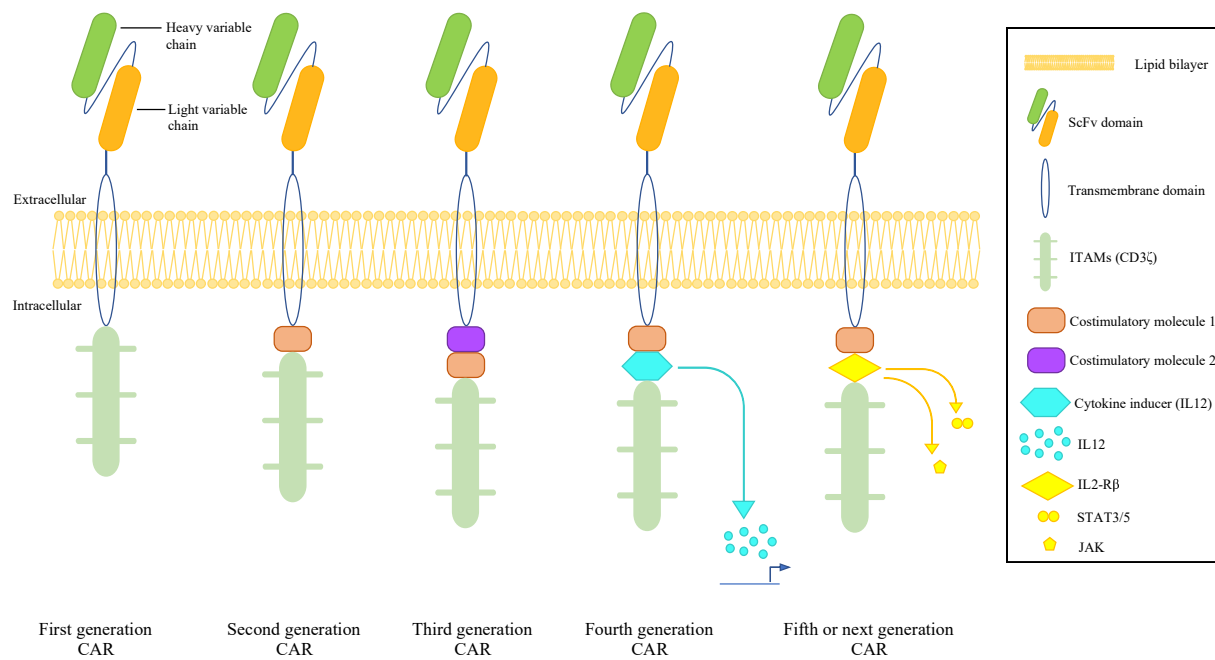

**Supplementary Figure S1: Different generations of chimeric antigen receptors.** All CAR generations are composed of the same extracellular domain which is a single chain variable fragment (a heavy variable chain and a light variable chain). In the intracellular domain, first generation CAR is composed of only a CD3 $\xi$  (immunoreceptor tyrosine based activation motifs, ITAM). Second generation CARs have, in addition to their CD3 $\xi$ , a co-stimulatory molecule (usually CD28 or 4-1BB). Third generation CARs include a second co-stimulatory domain. Fourth generation CAR has one costimulatory molecule and their ITAM domain, in addition to a constitutively or inducibly expressed cytokine (IL-12) upon activation, in order to enhance their cytotoxicity. Fifth or next generation CARs also have one costimulatory molecule and ITAM domains, paired with a truncated intracellular domain of cytokine receptors (IL-2R $\beta$  chain fragment with a STAT3/5 binding motif).

## Supplementary Table S1: CAR-NK trials on clinicaltrials.gov:

| TITLE                                                                                                                                                                                                    | CONDITIONS                                                                                                                                                                                                                                                                                                | PHASE         | INTERVENTION                                                                                                                                   | LOCATIONS                                                                                                                                                                                                                                                                                                                    | ENROLLEMEN<br>T | NCT<br>NUMBER | STATUS         |
|----------------------------------------------------------------------------------------------------------------------------------------------------------------------------------------------------------|-----------------------------------------------------------------------------------------------------------------------------------------------------------------------------------------------------------------------------------------------------------------------------------------------------------|---------------|------------------------------------------------------------------------------------------------------------------------------------------------|------------------------------------------------------------------------------------------------------------------------------------------------------------------------------------------------------------------------------------------------------------------------------------------------------------------------------|-----------------|---------------|----------------|
| Anti-CD19 CAR NK Cell Therapy for R/R Non-Hodgkin Lymphoma                                                                                                                                               | relapsed/refractory B NHL                                                                                                                                                                                                                                                                                 | Early Phase 1 | Anti-CD19 CAR-NK Cells                                                                                                                         | Xinqiao Hospital, Departement of hematology, Chongqing, China                                                                                                                                                                                                                                                                | 9 patients      | NCT04639739   | Not recruiting |
| Study of Anti-CD22 CAR NK Cells in Relapsed and Refractory B Cell Lymphoma                                                                                                                               | relapsed/refractory B NHL                                                                                                                                                                                                                                                                                 | Early Phase 1 | Anti-CD22 CAR-NK Cells                                                                                                                         | USA                                                                                                                                                                                                                                                                                                                          | 9 patients      | NCT03692767   | Not recruiting |
| Study of Anti-CD19 CAR NK Cells in Relapsed and Refractory B Cell Lymphoma                                                                                                                               | relapsed/refractory B NHL                                                                                                                                                                                                                                                                                 | Early Phase 1 | Anti-CD19 CAR-NK Cells                                                                                                                         | USA                                                                                                                                                                                                                                                                                                                          | 9 patients      | NCT03690310   | Not recruiting |
| A Phase I/II Study of Universal Off-the-shelf NKG2D-ACE2 CAR-NK Cells for Therapy of COVID-19                                                                                                            | COVID-19                                                                                                                                                                                                                                                                                                  | Phase 1/2     | NK cells, IL15-NK cells, NKG2D-ACE2 CAR-NK Cells                                                                                               | Chongqing Public Health Medical Center, Chongqing, China                                                                                                                                                                                                                                                                     | 90 patients     | NCT04324996   | Recruiting     |
| Study of Anti-Mesothelin Car NK Cells in Epithelial Ovarian Cancer                                                                                                                                       | Epithelial Ovarian Cancer                                                                                                                                                                                                                                                                                 | Early Phase 1 | Anti-Mesothelin Car-NK Cells                                                                                                                   | USA                                                                                                                                                                                                                                                                                                                          | 30 patients     | NCT03692637   | Not recruiting |
| Study of Anti-PSMA CAR NK Cell in Castration-Resistant Prostate Cancer                                                                                                                                   | Castration-resistant prostate cancer                                                                                                                                                                                                                                                                      | Early Phase 1 | Anti-PSMA CAR-NK cells                                                                                                                         | USA                                                                                                                                                                                                                                                                                                                          | 9 patients      | NCT03692663   | Not recruiting |
| Pilot Study of NKG2D-Ligand Targeted CAR-NK Cells in Patients With Metastatic Solid Tumours                                                                                                              | Metastatic solid tumors                                                                                                                                                                                                                                                                                   | Phase 1       | NKG2D-ligand CAR-NK Cells                                                                                                                      | Third Affiliated Hospital of Guangzhou Medical University, Guangzhou, China                                                                                                                                                                                                                                                  | 30 patients     | NCT03415109   | unknown        |
| Clinical Research of ROBO1 Specific CAR-NK Cells on Patients With Solid Tumors                                                                                                                           | Solid tumors                                                                                                                                                                                                                                                                                              | Phase 1/2     | ROBO1 CAR-NK cells                                                                                                                             | Suzhou Cancer Center, Nanjing Medical University, Radiation therapy department, Suzhou,                                                                                                                                                                                                                                      | 20 patients     | NCT03940820   | Recruiting     |
| Clinical Research of Adoptive BCMA CAR-NK Cells on Relapse/Refractory MM                                                                                                                                 | relapsed/refractory multiple myeloma                                                                                                                                                                                                                                                                      | Phase 1/2     | BCMA CAR-NK92 cells                                                                                                                            | Wuxi People's Hospital, Nanjing Medical University, Hematology department, Wuxi,                                                                                                                                                                                                                                             | 20 patients     | NCT03940833   | Recruiting     |
| Study of Anti-CD19/CD22 CAR NK Cells in Relapsed and Refractory B Cell Lymphoma                                                                                                                          | relapsed/refractory B NHL                                                                                                                                                                                                                                                                                 | Early Phase 1 | Anti-CD19/CD22 CAR-NK Cells                                                                                                                    | Beijing Cancer Hospital, China                                                                                                                                                                                                                                                                                               | 10 patients     | NCT03824964   | unknown        |
| CAR-pNK Cell Immunotherapy for Relapsed/Refractory CD33+ AML                                                                                                                                             | relapsed/refractory AML                                                                                                                                                                                                                                                                                   | Phase 1/2     | Anti-CD33 CAR-NK Cells                                                                                                                         | PersonGen BioTherapeutics, Suzhou, Jiangsu, China                                                                                                                                                                                                                                                                            | 10 patients     | NCT02944162   | unknown        |
| PCAR-119 Bridge Immunotherapy Prior to Stem Cell Transplant in Treating Patients With CD19 Positive Leukemia and Lymphoma                                                                                | CD19+ B cell malignancies (ALL, CLL, FL, MCL, DLBCL, B cell prolymphocytic leukemia) prior to HSCT                                                                                                                                                                                                        | Phase 1/2     | Anti-CD19 CAR-NK Cells                                                                                                                         | PersonGen BioTherapeutics, Suzhou, Jiangsu, China                                                                                                                                                                                                                                                                            | 10 patients     | NCT02892695   | unknown        |
| Safety of Intravenous Allogeneic Engineered Natural Killer Cells in Adults With AML or MDS                                                                                                               | relapsed/refractory AML and MDS                                                                                                                                                                                                                                                                           | Phase 1       | NKX101 CAR-NK Cells                                                                                                                            | Colorado Blood Cancer Institute, Denver ; Winship Cancer Institute, Atlanta ; Tausig Cancer Institute, Cleveland ; Sarah Cannon at TriStar Bone Marrow Transplant Center, Nashville ; USA                                                                                                                                    | 90 patients     | NCT04623944   | Recruiting     |
| Clinical Research of ROBO1 Specific BICAR-NK Cells on Patients With Pancreatic Cancer                                                                                                                    | Pancreatic Cancer                                                                                                                                                                                                                                                                                         | Phase 1/2     | BICAR-NK Cells (ROBO1 CAR-NK cells)                                                                                                            | Shanghai Ruijin Hospital, Departement of radiology, Shanghai, China                                                                                                                                                                                                                                                          | 9 patients      | NCT03941457   | Recruiting     |
| Clinical Research of ROBO1 Specific BICAR-NK/T Cells on Patients With Malignant Tumor                                                                                                                    | Malignant Tumor                                                                                                                                                                                                                                                                                           | Phase 1/2     | BICAR-NK/T Cells (ROBO1 CAR-NK/T cells                                                                                                         | Suzhou Kowloon Hospital, Hematology department, Suzhou, Jiangsu, China                                                                                                                                                                                                                                                       | 20 patients     | NCT03931720   | Recruiting     |
| CAR-CD19-CD28- $\alpha$ 2A- $\alpha$ Casp9-IL15-Transduced Cord Blood NK Cells, High-Dose Chemotherapy, and Stem Cell Transplant in Treating Participants With B-cell Lymphoma                           | CD19 positive recurrent or refractory NHL: MCL, DLBCL, FL                                                                                                                                                                                                                                                 | Phase 1/2     | BEAM-ASCT, Rituximab, umbilical cord blood derived CAR NK cells                                                                                | M D Anderson Cancer Center, Houston, Texas, USA                                                                                                                                                                                                                                                                              | 0 patients      | NCT03579927   | Withdrawn      |
| Umbilical & Cord Blood (CB) Derived CAR-Engineered NK Cells for B Lymphoid Malignancies                                                                                                                  | CD19+ B malignancies (ALL, CLL, NHL)                                                                                                                                                                                                                                                                      | Phase 1/2     | iC9/CAR-19/IL15-Transduced CB-NK Cells                                                                                                         | University of Texas MD Anderson Cancer Center, Houston, Texas, USA                                                                                                                                                                                                                                                           | 36 patients     | NCT03056339   | Recruiting     |
| KG2D CAR-NK Cell Therapy in Patients With Relapsed or Refractory Acute Myeloid Leukemia                                                                                                                  | relapsed/refractory AML                                                                                                                                                                                                                                                                                   | phase 1       | NKG2D CAR-NK cells                                                                                                                             | Hebei Yanda Lu Daopei Hospital, Sanhe, Hebei, China                                                                                                                                                                                                                                                                          | 9 patients      | NCT05247957   | Recruiting     |
| Clinical Study of IL1A Haploidentical CAR-NK Cells Targeting CD19 in the Treatment of Refractory/ Relapsed B-cell NHL                                                                                    | relapsed/refractory B NHL                                                                                                                                                                                                                                                                                 | phase 1       | Anti-CD19 CAR-NK Cells                                                                                                                         | 2nd Affiliated Hospital, School of Medicine, Zhejiang University, Hangzhou, Zhejiang, China                                                                                                                                                                                                                                  | 25 patients     | NCT04887012   | Recruiting     |
| NKG2D CAR-NK Cell Therapy in Patients With Refractory Metastatic Colorectal Cancer                                                                                                                       | refractory metastatic colorectal cancer                                                                                                                                                                                                                                                                   | Phase 1       | NKG2D CAR-NK cells                                                                                                                             | The First Affiliated Hospital, Zhejiang University, Hangzhou, Zhejiang, China                                                                                                                                                                                                                                                | 38 patients     | NCT05213195   | Recruiting     |
| Study of Anti-CD33/CLL1 CAR- NK in Acute Myeloid Leukemia                                                                                                                                                | AML                                                                                                                                                                                                                                                                                                       | Early Phase 1 | Anti-CD33/CLL1 CAR- NK Cells                                                                                                                   | Wuxi People's Hospital, Wuxi, Jiangsu, China                                                                                                                                                                                                                                                                                 | 18 patients     | NCT05215015   | Recruiting     |
| Study of Anti-5T4 CAR-NK Cell Therapy in Advanced Solid Tumors                                                                                                                                           | advanced solid tumors                                                                                                                                                                                                                                                                                     | Early Phase 1 | anti-5T4 CAR-NK cells                                                                                                                          | Wuxi People's Hospital, Wuxi, Jiangsu, China                                                                                                                                                                                                                                                                                 | 40 patients     | NCT05194709   | Recruiting     |
| Anti-CD33 CAR NK Cells in the Treatment of Relapsed/Refractory Acute Myeloid Leukemia                                                                                                                    | AML                                                                                                                                                                                                                                                                                                       | Phase 1       | Anti-CD33 CAR-NK Cells                                                                                                                         | Department of Hematology, Xinqiao Hospital, Chongqing, Chongqing, China                                                                                                                                                                                                                                                      | 27 patients     | NCT05008575   | Recruiting     |
| Anti-BCMA CAR-NK Cell Therapy for the Relapsed or Refractory Multiple Myeloma                                                                                                                            | refractory multiple myeloma                                                                                                                                                                                                                                                                               | Early Phase 1 | anti-BCMA CAR-NK cells                                                                                                                         | Department of Hematology, Xinqiao Hospital, Chongqing, Chongqing, China                                                                                                                                                                                                                                                      | 27 patients     | NCT05008583   | Recruiting     |
| Immunotherapy Combination: Irradiated PD-L1 CAR-NK Cells Plus Pembrolizumab Plus N-803 for Subjects With Recurrent/ Metastatic Gastric or Head and Neck Cancer                                           | Gastroesophageal junction cancers and advanced head and neck squamous cell cancer                                                                                                                                                                                                                         | phase 2       | Irradiated PD-L1 CAR-NK Cells, Pembrolizumab, N-803 (IL15 superagonist)                                                                        | National Institutes of Health Clinical Center, Bethesda, Maryland, United States                                                                                                                                                                                                                                             | 55 patients     | NCT04847466   | Recruiting     |
| Study of Anti-5T4 CAR- raNK Cell Therapy in Locally Advanced or Metastatic Solid Tumors                                                                                                                  | Locally Advanced or Metastatic Solid Tumors                                                                                                                                                                                                                                                               | Early Phase 1 | Anti-5T4 CAR-raNK Cells                                                                                                                        | Shanghai East Hospital, Shanghai, Shanghai, China                                                                                                                                                                                                                                                                            | 136 patients    | NCT05137227   | Recruiting     |
| CAR-pNK Cell Immunotherapy in MUC1 Positive Relapsed or Refractory Solid Tumor                                                                                                                           | Hepatocellular Carcinoma, Non-small Cell Lung Cancer, Pancreatic Carcinoma, Triple-Negative Invasive Breast Carcinoma, Malignant Glioma of Brain, Colorectal Carcinoma, Gastric Carcinoma                                                                                                                 | Phase 1/2     | anti- MUC1 CAR-pNK cells                                                                                                                       | PersonGen BioTherapeutics (Suzhou) Co., Ltd., Suzhou, Jiangsu, China                                                                                                                                                                                                                                                         | 10 patients     | NCT02839954   | unknown        |
| CAR-pNK Cell Immunotherapy in CD7 Positive Leukemia and Lymphoma                                                                                                                                         | CD7+ AML, precursor T cell lymphoblastic leukemia/lymphoma, T-cell prolymphocytic leukemia, T-cell LGL leukemia, Peripheral T cell lymphoma NOS, angioimmunoblastic T cell lymphoma, Extranodal NK/T-cell lymphoma nasal type, enteropathy type intestinal T cell lymphoma, hepatosplenic T cell lymphoma | Phase 1/2     | anti-CD7 CAR-pNK cells                                                                                                                         | PersonGen BioTherapeutics (Suzhou) Co., Ltd., Suzhou, Jiangsu, China                                                                                                                                                                                                                                                         | 10 patients     | NCT02742727   | Recruiting     |
| Phase I/II Study of CD5 CAR Engineered IL15-Transduced Cord Blood-Derived NK Cells in Conjunction With Lymphodepleting Chemotherapy for the Management of Relapsed/Refractory Hematological Malignancies | hematological malignancies                                                                                                                                                                                                                                                                                | Phase 1/2     | CAR-5/IL15- transduced CB derived anti CD5 CAR-NK cells                                                                                        | M D Anderson Cancer Center, Houston, Texas, United States                                                                                                                                                                                                                                                                    | 48 patients     | NCT05110742   | Not recruiting |
| phase I/II Study of CAR-70- Engineered IL15-transduced Cord Blood-derived NK Cells in Conjunction With Lymphodepleting Chemotherapy for the Management of Relapse/ Refractory Hematological Malignancies | B-Cell NHL, MDS, AML                                                                                                                                                                                                                                                                                      | Phase 1/2     | CAR-70/IL15- transduced CB- NK cells                                                                                                           | M D Anderson Cancer Center, Houston, Texas, United States                                                                                                                                                                                                                                                                    | 94patients      | NCT05092451   | Not recruiting |
| FT576 in Subjects With Multiple Myeloma                                                                                                                                                                  | multiple myeloma                                                                                                                                                                                                                                                                                          | Phase 1       | FT576 (Allogenic CAR NK cells with BCMA expression)                                                                                            | University of Alabama at Birmingham, Alabama; Colorado Blood Cancer Institute, Colorado; Indiana University Melvin and Bern Simon Comprehensive Cancer Center, Indiana; Tennessee Oncology, Tennessee; Froedtert Hospital, Medical College, Wisconsin, USA                                                                   | 168 patients    | NCT05182073   | Recruiting     |
| Universal Chimeric Antigen Receptor-modified AT19 Cells for CD19+ Relapsed/Refractory Hematological Malignancies                                                                                         | ALL, CLL, B cell NHL                                                                                                                                                                                                                                                                                      | Phase 1       | AT19 CAR-NK-CD19                                                                                                                               | Union Hospital, Huazhong University of Science and Technology, Wuhan, Hubei, China                                                                                                                                                                                                                                           | 27 patients     | NCT04796688   | Recruiting     |
| Cord Blood Derived Anti-CD19 CAR-Engineered NK Cells for B Lymphoid Malignancies                                                                                                                         | B ALL, CLL, B NHL                                                                                                                                                                                                                                                                                         | Phase 1       | Cord Blood derived CAR-NK-CD19                                                                                                                 | Union Hospital, Huazhong University of Science and Technology, Wuhan, Hubei, China                                                                                                                                                                                                                                           | 27 patients     | NCT04796675   | Recruiting     |
| NKX019, Intravenous Allogeneic Chimeric Antigen Receptor Natural Killer Cells (CAR NK), in Adults With B-cell Cancers                                                                                    | NHL, B ALL, Large B cell lymphoma, MCL, Indolent lymphoma, Waldenström macroglobulinemia, CLL, small lymphocytic lymphoma, aggressive lymphoma                                                                                                                                                            | Phase 1       | NKX019: allogenic anti CD19 Peripheral blood derived CAR NK cell expressing IL15                                                               | Colorado Blood Cancer Institute, Colorado; University of Chicago, Illinois; The Cleveland Clinic Foundation, Ohio, United States<br>*Institute of Haematology, Camperdown; St. Vincent's Hospital, Sydney, New South Wales,Royal Brisbane and Woman's Hospital, Queensland,Peter MacCallum Cancer Center Victoria, Australia | 60 patients     | NCT05020678   | Recruiting     |
| A Study of CNTY-101 in Participants With CD19-Positive B-Cell Malignancies                                                                                                                               | CD19 positive B cell malignancies                                                                                                                                                                                                                                                                         | Phase 1       | CNTY-101: allogeneic, iPSC-derived CAR-iNK cell therapy that has been engineered to express CD19 CAR, soluble IL-15, and an EGFR safety switch | USA                                                                                                                                                                                                                                                                                                                          | 75 patients     | NCT05336460   | Not recruiting |

LNH: non hodgekin lymphoma; AML: acute myeloid lymphoma; ALL: acute lymphoblastic leukemia; MDS: myelodysplasic syndrome; CLL : chronic lymphoid leukemia; MCL: mantle cell lymphoma; DLBCL: diffuse large B cell lymphoma; FL: Follicular lymphoma; BEAM: Carmustine, Etoposide, Cytarabine, Melphalan; ASCT: Autologuous hematopoietic stem cell transplantation; HSCT: hematopoietic stem cell transplantation

**Supplementary Table S2: Key Points**

|   |                                                                                                                                                                                                                                                                                                                                                                                                                                                                                                                                                                                                                                                                                                                                                                                                                                                                                                                                                                                                                                                                                                                                                                                                                                                                                                                                                                                                                                                                                                                                                                                  |
|---|----------------------------------------------------------------------------------------------------------------------------------------------------------------------------------------------------------------------------------------------------------------------------------------------------------------------------------------------------------------------------------------------------------------------------------------------------------------------------------------------------------------------------------------------------------------------------------------------------------------------------------------------------------------------------------------------------------------------------------------------------------------------------------------------------------------------------------------------------------------------------------------------------------------------------------------------------------------------------------------------------------------------------------------------------------------------------------------------------------------------------------------------------------------------------------------------------------------------------------------------------------------------------------------------------------------------------------------------------------------------------------------------------------------------------------------------------------------------------------------------------------------------------------------------------------------------------------|
| 1 | NK cells represents about 5-15 % of circulating lymphocytes.                                                                                                                                                                                                                                                                                                                                                                                                                                                                                                                                                                                                                                                                                                                                                                                                                                                                                                                                                                                                                                                                                                                                                                                                                                                                                                                                                                                                                                                                                                                     |
| 2 | <p>Their cytotoxicity is antigen independent and doesn't need priming. It depend on a balance between inhibitory and activating signals from a complex interaction between their receptors and the ligands present on the target.</p> <p>They don't cause GVHD and can be used in an allogenic setting, representing a huge benefit over autologous cells, supporting banking with a rapid availability of the product</p> <p>Superior quality and homogeneity of effectors cells</p> <p>Allogenic CAR-NK seem to have a better safety profile with less toxicity (few to no CRS and neurotoxicity).</p>                                                                                                                                                                                                                                                                                                                                                                                                                                                                                                                                                                                                                                                                                                                                                                                                                                                                                                                                                                         |
| 3 | <p>Advantages over CAR-T cells</p> <p>mechanisms of actions: classical cytotoxicity via the CAR and ADCC with the possibility to target a second tumoral antigen and limiting the risk of relapsed by antigen loss.</p> <p>Many sources to generate CAR-NK: PBMC, UCB units, NK92 cell line, iPSC.</p> <p>Possible generation of multiple batches from a single cellular source with a reduction in costs and the possibility for multiple injections (remains to be confirmed, according to the dose defined for a therapeutic benefit).</p>                                                                                                                                                                                                                                                                                                                                                                                                                                                                                                                                                                                                                                                                                                                                                                                                                                                                                                                                                                                                                                    |
| 4 | <p>Disadvantages</p> <p>NK cells derived from immatures cells (UBC, iPSC) have a CD56<sup>bright</sup> KIR<sup>neg</sup> NKG2A<sup>+</sup> CD16<sup>low</sup> profile making them very proliferative but less cytotoxic. Nevertheless, this should be overpassed by culture in presence of cytokines and transduction.</p> <p>PBMC derived NK cells have a more cytotoxic profile with CD56<sup>dim</sup>, CD16<sup>+</sup>, KIR<sup>+</sup> but are less proliferative</p> <p>There remain significant problems in the production of CAR-NK cells. The optimal protocol for the introduction of foreign genetic material and subsequent expansion of the NK cells remains to be defined, making the development of feasible and reproducible GMP protocols still a challenge. The viability of the CAR-NK cells is central to the success of the therapeutic product, as the long-term persistence of tumor-specific CAR cells in the host is thought to promote the therapeutic efficacy.</p> <p>The interaction between NK inhibitory receptors (KIR and NKG2A) and their ligands (HLA-C, HLA-Bw4 and HLA-E) inhibits NK functions. To surpass this inhibition, further modifications are needed: selection of donors based on their HLA (especially related haploidentical donors) or by added cytokinetic signals like IL15 or IL2.</p> <p>Like all allogenic HLA incompatible cells, the risk is immune rejection and the short persistence of the injected cells. Repeated injections and the use of cytokinetic signals is a promising way to surpass this obstacle.</p> |

**Supplementary Table S3: Abbreviations**

|       |                                                         |
|-------|---------------------------------------------------------|
| NK    | Natural Killer                                          |
| MHC   | Major Histocompatibility Complex                        |
| TRAIL | Tumor necrosis factor Related Apoptosis Inducing Ligand |
| HLA   | Human Leukocyte Antigen                                 |
| GVHD  | Graft Versus Host Disease                               |
| GVL   | Graft Versus Leukemia/lymphoma                          |
| NCR   | natural cytotoxicity receptors                          |
| KIR   | Killer cell Ig-like Receptors                           |
| ADCC  | Antibody Dependent Cellular Cytotoxicity                |
| Ig    | Immunoglobulin                                          |
| B-ALL | B Acute Lymphoblastic Leukemia                          |
| CAR   | Chimeric Antigen Receptor                               |
| CRS   | Cytokine Release Syndrome                               |
| TCR   | T Cell Receptor                                         |
| scFv  | single chain variable Fragment                          |
| iPSCs | induced Pluripotent Stem Cells.                         |
